# Supplementary material
Source: publisher figshare collection journal article supplement (https://gsajournals.figshare.com/ndownloader/files/16628186)
Supplement: Supplementary file 1 [file 16628186]

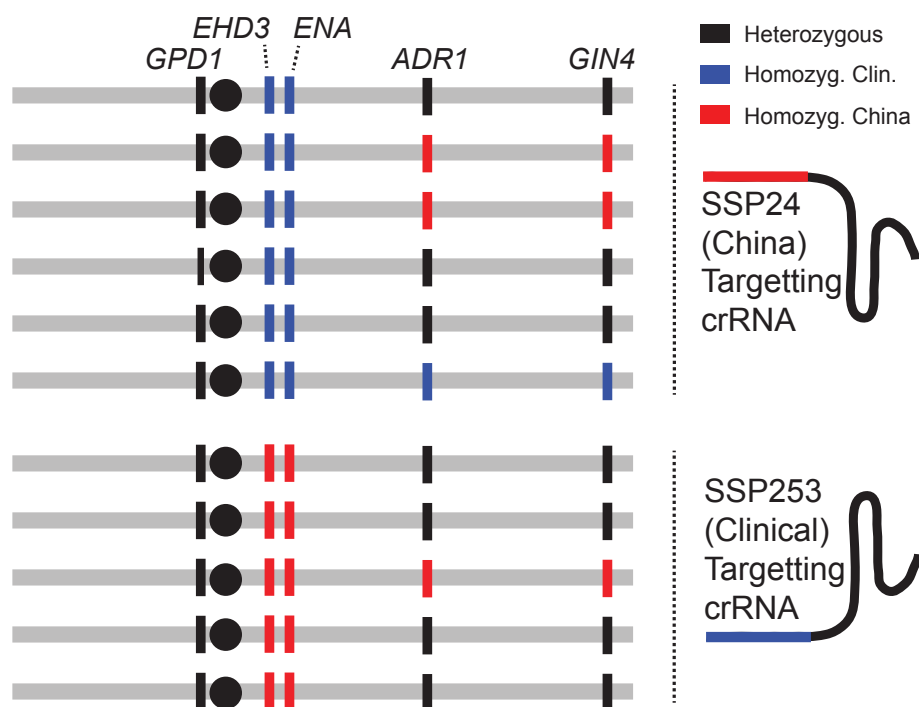

**Suppl. Figure 6.** Depiction of 11 CRISPR-mediated LOH transformants of SSP309 which included the *ENA* locus and were used for fitness measurements by growth curve analysis (Figure 7A). Each of the transformants were genotyped using PCR-RFLP markers (Suppl. Table 2). Shown is a relative map of Chr IV with the black circle indicating the centromere.
